# Supplementary material for: A Network View on Psychiatric Disorders: Network Clusters of Symptoms as Elementary Syndromes of Psychopathology
Source: PLoS One. 2014 Nov 26;9(11):e112734. doi: 10.1371/journal.pone.0112734 (PMC4245101; doi:10.1371/journal.pone.0112734)
Supplement: Information S1 — Raw data file containing item scores that were used to generate the Psychopathology Web. Scores on items of the CPRS (horizontal) are displayed, as measured in a heterogeneous population of 192 patients with some form of psychopathology as defined in the beginning of the Introduction (vertical). For further information, see Materials and Methods section. (XLS) [file pone.0112734.s001.xls]

## Sheet: CPRS_minus_it_35_it_55
no	it01_1	it02_1	it03_1	it04_1	it05_1	it06_1	it07_1	it08_1	it09_1	it10_1	it11_1	it12_1	it13_1	it14_1	it15_1	it16_1	it17_1	it18_1	it19_1	it20_1	it21_1	it22_1	it23_1	it24_1	it25_1	it26_1	it27_1	it28_1	it29_1	it30_1	it31_1	it32_1	it33_1	it34_1	it36_1	it37_1	it38_1	it39_1	it40_1	it41_1	it42_1	it43_1	it44_1	it45_1	it46_1	it47_1	it48_1	it49_1	it50_1
1	5	0	4	3	4	4	4	0	3	0	1.00529	1	2	2	2	3	4	3	3	0	0	0	6	1.29101	3	0	0	0	0	0	0	0	0	0	0	0	0	0	0	3	0	0	0	0	0	0	0	0	0
2	6	0	2	0	6	1	3	0	4	0	0	0	4	4	1.34574	4	4	4	0	0	0	1	5	4	2	3	0	2	0	0	0	0	0	0	0	0	0	0	0	4	0	0	1	0	0	0	0	0	0
3	4	0	3	1	5	1	2	1	4	0	0	0	0	1	2	0	0	0	4	0	4	0	0	3	0	0	0	0	0	0	0	0	0	0	0	0	0	0	0	4	0	1	0	0	0	0	0	0	0
4	6	0	2	3	5	2	5	0	3	0	0	0	0	6	6	3	4	5	5	0	5	0	4	6	6	6	0	0	0	0	0	0	2	0	0	0	0	0	0	3	0	0	0	0	0	0	0	0	0
5	1	0	2	0	1	1	0	3	1	4	2	2	0	0	3	3	0	3	4	0	2.15676	0	2	4	0	3	0	0	0	0	0	0	0	0	0	2	1	0	0	2	0	0	0	0	1	0	0	0	0
6	4	0	2	0.717277	4	1	0	2	2	0	4	0	2	2	0	0	0	0	3	0	0	0	4	4	3	0	0	0	0	0	2	0	0	0	0	0	0	0	0	1	0	0	0	0	3	0	0	0	0
7	0	0	4	0	0	2	0	0	0	0	0	0	2	1	0	3	0	3	0	0	0	0	0	0	0	0	0	0	0	0	0	0	1	0	0	0	0	0	0	1	0	0	0	0	0	0	0	0	0
8	6	0	6	6	5	4	5	0	6	5	4	6	2	0	0	4	0	4	6	0	2.15676	0	6	3	3	0	0	0	0	4	4	0	2	0	0	0	3	5	0	4	0	0	0	0	3	0	0	0	0
9	0	0	2	3	0	1.59686	0	0	0	0	0	0	0	1	3	2	0	0	2	0	4	0	4	2	2	0	0	0	0	0	0	0	0	0	0	0	0	0	0	0	0	0	0	0	4	0	0	0	0
10	1	0	3	3	0	1	1	2	0	0	2	0	0	0	4	0	0	0	2	0	4	0	5	4	2	0	0	0	0	0	2	0	0	0	0	0	0	0	0	0	0	0	0	0	4	0	0	0	1
11	1	1	3	0	4	0	1	0	0	0	5	0	0	2	0	2	0	0	0	0	2.15676	0.246073	6	2	1	4	0	0	0	0	0	0	0	0	0	0	0	0	0	0	0	0	0	0	3	0	0	0	0
12	3	0	2	0	0	1	0	2	0	0	2	0	2	1	2	1	0	0	2	0	0	0	3	3	3	2	0	0	0	0	0	0	0	0	0	0	0	0	0	1	0	0	0	0	1	0	0	0	0
13	3	0	3	0	3	1	0	0	0	0	0	0	0	0	0	3	0	0	2	2	4	0	0	0	3	0	0	2	0	2	0	2	2	0	0	0	0	0	0	0	0	0	0	0	0	0	0	0	0
14	3	0	4	0	0	3	1	0	4	6	1.00529	0	3	2	2	3	4	0	4	0	3	0	3	0	3	0	0	0	0	0	1	0	0	0	0	0	0	0	0	4	0	0	0	0	2	0	0	0	0
15	3	0	4	0	0	2	1.19577	0	2	0	0	0	0	0	4	0	0	0	4	0	6	0	5	4	3	5	0	0	0	0	0	0	2	0	0	0	0	0	0	4	0	0	2	0	2	0	0	0	0
16	2	0	3	0	3	1	0	0	0	3	0	2	2	0	0	0	0	0	0	4	0	0	2	0	2	0	0	0	0	0	0	0	0	0	0	0	0	0	0	0	0	0	0	0	0	0	0	0	0
17	4	0.539267	4	0	1	0	1	0	0	0	4	0	2	4	4	4	4	0	0	4	6	0	1	1	2	2	0	0	0	0	0	1	0	0	0	0	0	0	0	0	0	0	0	0	0	0	0	0	0
18	0	0	2	0	0	2	0	0	0	0	2	0	3	1	0	2	0	0	0	4	0	0	1	2	1	0	0	0	0	0	0	0	2	0	0	0	0	0	0	0	0	0	0	0	0	0	0	0	0
19	6	0	4	3	4	0	1	2	6	0	0	2	4	1	4	3	0	2	4	0	6	0	6	3	0	2	0	0	0	2	0	0	2	0	0	0	0	0	0	3	0	0	0	0	2	0	0	0	0.329843
20	0	0	0	0	0	2	0	0	0	0	0	0	0	0	0	0	0	0	0	4	0	0	0	3	0	0	0	0	0	0	0	0	0	0	0	0	0	0	0	0	0	0	0	0	2	0	0	0	1
21	3	0	4	1	3	1	0	1	3	0	0	0	4	2	1	4	4	4	4	0	3	0	3	4	0	0	1	0	2	0	0	0	0	0	0.475936	0	0	0	0.289474	3	0	0	0	0	2	0	0	0	0
22	1	0	4	3	0	1	0	0	0	0	0	0	0	0	0	0	0	3	5	0	0	0	0	1	3	0	0	0	0	0	0	0	0	0	0	2	0	0	0	1	0	0	0	0	0	0	0	0	0
23	3	0	3	0	0	2	0	0	0	0	6	0	2	1	2	0	0	0	0	1	1	0	3	3	3	0	1	0	0	0	0	0	0	0	0	0	0	0	0	2	0	0	1	0	3	0	0	0	0
24	4	0	5	5	4	3	4	0	1	0	1	0	2	2	0	4	3	0	0	0	3	0	3	4	3	0	0	3	0	0	0	0	0	0	3	1	3	0	0	4	0	0	0	0	2	0	0	0	0
25	6	0	6	0	4	2	5	3	4	0	5	3	2	4	4	3	2	5	5	0	6	0	3	4	4	3	0.408377	3	0	0	0	0	1	0	0	0	0	0	5	5	0	1	0	0	2	0	0	0	0
26	4	0	4	3	2	4	4	0	3	2	5	3	2	3	0	4	2	0	0	4	4	0	2	3	0	1	0	0	2	2	2	0	0	0	0	0	0	2	0	1	0	0	0	0	2	0	0	0	0
27	5	1	6	1	2	2	5	0	6	0.691489	5	3	4	5	5	4	4	5	6	0	6	0	6	1.29101	5	5	6	6	1	2	0	0	1	0	0.475936	0	2	0	0	6	0	0	0	0	4	0	0	0	0
28	1	0	3	0	3	1	0	5	0	0	0	0	2	3	1	2	2	3	2	0	4	0	6	0	0	0	0	0	0	0	0	0	3	0	0	0	0	0	0	2	0	0	0	0	1	0	0	0	0
29	0	0	0	0	0	0	0	0	0	0	0	0	0	0	0	0	0	0	0	0	0	0	0	0	0	0	0	0	0	0	0	0	0	0	0	0	0	0	0	0	0	0	0	0	0	0	0	0	0
30	1	0	3	3	1	1	1	0	0	0	0	0	1	0	0	3	0	0	2	0	0	0	0	0	0	0	0	0	0	0	0	0	0	0	0	0	0	0	0	2	0	0	0	0	2	0	0	0	0
31	3	0	3	0	0	2	0	2	5	3	0	2	4	4	4	3	2	0	0	0	0	0	2	2	4	3	0	0	2	0	2	0	3	0	0	0	0	0	0	4	0	0	0	0	2	0	0	0	0
32	4	0	3	0	0	2	0	1	5	0	0	0	2	2	3	4	2	2	0	0	0	0	2	3	3	0	0	1	0	0	0	0	0	0	0	0	0	0	0	3	0	0	0	0	2	0	0	0	1
33	3	0	3	0	3	3	1	1	5	0	0	2	3	3	0	3	0	1.2199	1	0	0	0	0	0	3	2	0	0	0	0	0	0	0	0	0	0	0	0	0	0	1	0	0	0	0	0	0	0	0
34	3	0	2	0	0	3	0	0	2	4	0	0	2	1	0	0	2	0	0	3	0	5	0	2	2	0	0	0	0	0	0	0	0	0	0	0	0	0	0	0	1	0	0	0	2	0	0	0	0
35	0	0	2	0	0	0	0	1	2	0	2	0	2	0	4	3	3	0	0	4	0	0	2	0	3	3	0	0	0	0	0	0	0	0	0	0	0	0	0	0	0	0	0	0	2	0	0	0	0
36	1	0	3	0	0	1	0	0	0	5	0	0	0	0	0	4	0	0	0	0	0	0	2	0	0	0	0	0	0	0	0	0	0	0	0	0	0	0	0	1	0	0	0	0	1	0	0	0	0
37	0	0	0	1	4	2	0	0	0	0	0	2	0	3	4	4	2	3	0	6	4	0	0	0	3	0	0	0	0	3	0	2	1	0	0	0	0	0	0	1	0	0	0	0	1	0	0	0	0
38	4	0	1	0	5	4	1	0	2	0.691489	0	0	4	4	0	4	0	2	3	0	5	0	1	0	0	0	0	0	0	0	0	0	0	0	0	0	0	0	0	5	0	0	0	0	1	0	0	0	0
39	0	1	0	0	0	0	0	0	0	0	2	1	1	1	5	0	2	0	5	0	0	0	2	4	3	3	0	0	0	2	0	0	2	0	0	0	0	0	0	0	0	0	0	0	2	0	0	0	0
40	4	0	4	0	2	0	0	4	2	0	0	0	0	0	1	0	2	0	3	0.794737	4	0	5	2	2	3	0	0	0	0	0	0	0	0	0	0	0	0	0	1	0	0	0	0	0	0	0	0	0
41	1	2	4	4	0	0	1.19577	1	0	0	0	0	0	0	0	3	2	0	4	0	0	0	0	0	0	3	0	0	0	0	0	0	2	0	0.475936	0	0	0	0	0	1	0	2	0	0	0	0	0	0
42	0	0	0	0	0	2	0	0	1	0	2	0	2	1	2	0	0	0	0	0	0	0	3	3	2	0	0	0	0	0	2	0	0	0	0	0	0	0	0	0	0	0	0	0	2	0	0	0	0
43	1	0	0	0	0	0	0	0	0	6	0	0	0	4	2	4	4	3	0	0	0	0	3	2	0	0	0	5	4	5	6	0	2	0	5	0	3	5	6	2	0	0	0	0	2	0	1	0	0
44	0	6	0	0	0	0	0	0	0	0	0	0	0	0	0	0	0	0	0	0	0	0	0	0	0	0	0	0	0	0	0	5	0	4	4	3	3	5	0	0	2	0	0	0	2	0	0	0	0
45	0	0	0	0	0	0	0	0	0	0	0	0	0	0	0	0	0	0	6	0	0	2	0	0	0	0	0	0	2	0	0	0	2	5	0.475936	0	4	0	3	0	3	0	0	0	0	1	0	0	0
46	6	0	0	0	6	4	2	0	0	0	1	0	2	1	0	0	4	0	0	0	6	0	1	0	0	0	0	5	0	0	0	0	0	1	3	0	3	0	0	5	0	0	0	0	2	2	0	0	0
47	0	0	0	0	0	0	0	0	2	0	0	0	0	4	0	0	0	0	0	0	0	2	6	3	0	0	2	0	0	0	0	0	0	0	0	2	4	0	0	3	0	0	0	0	2	4	0	0	0
48	0	0	0	0	0	1	0	0	0	0	0	0	2	0	0	0	0	0	0	0	4	0	0	0	0	0	0	0	2	0	0	6	0	0	0	0	0	0	0	1	0	0	0	0	0	1	0	1	0
49	0	0	0	0	0	0	1	0	0	0	0	1	2	0	0	0	4	0	0	2	0	0	1	2	0	3	0	0	0	0	0	0	0	0	0	0	0	0	0	0	0	0	0	0	2	1	0	0	0
50	0	0	0	0	4	1	0	0	0	0	0	0	2	0	0	4	3	0	4	0	2.15676	0	0	3	3	0	0	0	0	0	4	0	0	0	0	0	0	1	3	4	0	1	0	0	1	0	0	0	0
51	1	0	4	0	4	3	1	5	0	0	1.00529	0	2	4	4	2	3	4	2	4	4	0	2	4	5	4	0	0	0	4	3	0	0	3	4	3	0	0	0	3	0	0	0	0	2	1	0	0	0
52	0	6	3	0	0	0	0	0	0	0	0	0	0	0	1	0	0	0	0	0	0	1	4	2	1	0	0	0	2	0	0	0	0	0	0	0	2	0	0	0	2	2	0	0	0	0	0	0	0
53	6	0	3	0	4	3	0	0	4	0	5	0	4	4	5	2	0	3	0	2	4	0	4	0	0	0	0	0	0	0	3	0	3	0	0	0	0	0	0	5	0	0	0	0	3	0	0	0	2
54	5	0	4	0	4	4	4	0	4	4	5	0	0	5	6	6	4	4	1	6	6	0	2	3	0	0	0	0	0	3	3	0	0	0	0	0	0	0	5	5	0	0	0	0	2	0	0	0	0
55	0	0	2	3	0	0	0	0	0	0	0	0	0	0	0	0	0	0	0	0	0	0	2	2	0	0	0	0	0	0	0	0	0	0	0	0	0	0	0	0	1	0	0	0	2	0	0	0	0
56	0	0	2	0	0	0	0	0	1	0	5	0	0	0	0	0	0	0	0	2	0	0	0	0	0	0	0	0	0	0	0	0	4	0	5	0	0	0	0	0	0	0	0	0	2	0	0	0	0
57	1	0	3	2	3	3	3	0	0	0	0	0	6	3	4	4	0	2	6	0	0	3	4	4	2	2	0	0	0	0	1	0	2	0	4	0	3	1	0	3	0	0	0	0	2	0	0	0	0
58	3	0	3	3	4	2	0	0	0	0	1	0	0	0	2	4	0	2	3	0	4	0	1	0	0	0	0	0	0	0	0	0	1	0	0	0	0	0	0	3	0	0	0	0	2	0	0	0	0
59	0	3	0	0	0	0	0	0	0	0	0	0	0	0	0	0	0	0	0	0	0	3	0	0	0	0	0	0	0	0	2	0	0	0	0	0	0	0	0	0	2	0	3	0	0	0	0	0	0
60	2	0	3	0	4	3	1	0	0	5	2	0	3	4	3	2.04737	0	2	0	4	3	0	4	0	2	4	0	2	3	6	1	1	4	2	0	0	3	0	0	4	0	0	1	0	0	0	0	0	0
61	1	0	2	1	4	1	0	0	0	0	0	0	2	0	0	2	3	4	3	0	6	0	0	0	0	4	6	3	6	0	0	6	0	0	0	0	0	0.273684	4	0	0	0	0	0	0	0	0	0	0
62	6	0	2	0	0	1	4	0	4	0	0	0	2	4	4	0	0	2	0	0	0	0	3	3	1	0	0	0	0	0	2	0	0	0	0	0	6	0	0	5	0	0	0	0	0	0	0	0	0
63	2	0	4	0	0	2	0	0	0	0	0	3	0	0	0	0	0	5	5	0	6	0	4	0	2	0	0	0	0	3	0	0	2	0	0	0	0	0	0	0	0	0	0	0	0	0	0	0	0
64	0	2	2	0	0	0	0	0	0	0	2	0	2	0	0	0	0	0	2	3	0	1	3	2	0	3	0	0	0	0	0	0	0	0	0	0	2	0	0	0	1	0	0	0	2	0	0	0	0
65	3	0	2	0	2	3	1	1	0	0	0	0	2	4	0	0	0	2	1	0	0	2	4	2	2	0	0	0	0	2	0	0	0	0	2	0	0	0	0	3	0	0	0	0	0	0	0	0	0
66	0	6	0	0	0	0	0	0	0	0	0	0	0	0	0	0	0	0	0	4	0	2	2	0	3	0	0	0	0	4	0	6	4	6	0	0	0	0	0	0	1	0	0	0	0	0	0	0	0
67	1	0	4	0	3	2	0	2	0	0	0	2	2	3	4	4	0	0	0	0	0	0	3	2	2	5	0	0	0	0	0	4	0	0	0	0	2	0	0	0	2	0	0	0	0	0	0	0	0
68	1	0	0	0	0	1	0	0	0	2	5	2	1	0	0	4	4	3	5	0	4	0	4	0	0	0	0	0	0	0	0	3	1	0	5	0	0	4	0	0	0	0	0	0	0	1	0	2	0
69	0	1	3	0	0	1	0	0	0	0	0	3	1	0	0	4	1	0	3	0	0	0	2	0	0	3	0	2	0	3	0	0	2	0	0	0	0	3	0	0	1	0	0	0	2	0	0	0	0
70	0	0	3	0	0	0	0	0	0	0	0	0	0	0	3	0	0	0	4	0	0	0	1	0	0	0	0	0	0	0	0	0	2	0	0	0	0	0	0	0	1	0	0	0	0	0	0	0	0
71	0	0	0	0	0	0	0	0	0	0	0	0	0	0	0	0	0	0	0	4	2.15676	0	4	0	0	0	0	0	0	0	0	1	4	1	0	0	0	0	0	0	0	0	0	0	3	0	2	0	0
72	5	0	3	0	3	1	1	0	0	0	0	0	3	3	0	4	0	0	0	4	0	0	0	0	0	0	0	0	0	0	0	0	0	0	0	0	0	0	0	5	0	0	0	0	0	0	0	1	0
73	6	0	2	0	5	4	6	0	0	0	0	0	3	5	1.34574	5	0	5	5	0	6	0	3	3	3	0	0	3	0	3	0	0	0	0	0	0	0	0	0	3	0	0	0	3	0	0	0	0	0
74	0	0	0	0	0	0	0	0	0	0	0	0	2	0	1	0	0	0	0	0	4	0	2	0	0	0	0	0	0	0	4	0	0	0	0	0	0	0	0	0	1	0	0	0	0	0	0	0	0
75	6	0	5	0	6	1	1.19577	0	0	0	0	0	3	6	1.34574	6	4	5	5	0	6	0	1	0	6	4	0	0	0	0	0	0	0	0	0	0	0	0	0	6	0	0	0	0	2	0	0	0	2
76	4	0	2	0	0	0	0	0	0	0	0	0	2	3	3	4	2	0	4	0	6	0	3	0	0	0	0	0	0	0	0	0	0	0	0	0	0	0	0	0	0	0	0	1	2	0	0	0	0
77	0	2	0	0	1	0	0	0	0	0	1	0	2	0	0	3	0	0	4	0	0	0	1	2	0	3	0	0	0	0	0	0	0	0	0	3	2	0	0	0	0	0	0	0	2	1	0	0	0
78	0	0	0	0	4	3	2	1	0	0	2	0	2	1	2	0	0	2	0	3	0	0	2	2	1	0	3	0	0	0	0	1	0	0	1	0	0	0	0	0	0	0	0	0	0	2	0	0	0
79	0	0	0	0	3	0	0	0	0	0	0	0	2	0	0	2	0	0	0	6	0	0	0	0	0	0	0	0	4	4	0	0	2	0	2	0	0	0	0	0	0	0	0	0	0	3	0	0	0
80	0	0	2	0	2	2	0	0	0	0	0	0	0	0	0	0	0	0	2	2	0	0	3	3	0	0	0	0	0	4	2	0	0	0	0	0	0	0	0	1	0	0	0	0	0	0	0	0	0
81	1	1	4	0	0	1	0	0	1	0	0	0	1.34031	0	0	4	4	0	4	0	0	0	2	0	0	0	2	0	0	4	2	1	2	0	0	2	3	0	0	1	0	0	0	0	3	0	0	0	2
82	3	0	5	1	3	2	3	1	0	0	2	0	0	1	3	0	0	0	0	0	0	0	4	0	0	0	0	0	5	0	0	0	0	0	0	2	6	0	2	4	0	0	0	0	0	0	0	2	0
83	4	0	4	1	4	3	0	1	0	0.691489	1	0	3	4	1.34574	4	1	0	0	0	0	0	6	3	6	0	0	0	0	0	0	0	0	0	0	0	0	0	0	4	0	0	0	0	2	0	0	0	0
84	0	0	5	3	0	2	0	0	0	0	0	0	0	0	0	0	0	0	6	0	0	2	1	3	0	0	0	0	0	0	3	3	2	0	2	2	0	0	0	3	0	0	2	3	2	1	1	1	0
85	0	0	0	1	1	1	0	0	0	0	0	0	0	0	0	0	0	0	3	0	4	0	3	0	0	0	0	0	0	0	0.636842	0	1	0	0	0.431579	0.447368	0	2	0	1	0	0	0	2	0	0	2	0
86	4	0	4	3	0	2	4	2	4	0.691489	0	0	0	2	3	0	0	0	0	4	0	0	3	3	4	0	5	5	0	0	2	0	0	0	2	0	1	1	0	0	0	0	0	0	2	2	0	0	0
87	6	0	5	2	3	4	4	0	0	0	0	0	3	0	0	5	0	3	5	0	0	0	3	0	2	0	0	0	0	0	0	0	0	0	0	0	0	0	0	6	0	0	4	0	2	0	0	0	1
88	4	1	2	0	0	3	5	0	0	4	5	0	0	3	2	3	0	0	5	0	4	0	4	5	3	0	2	0	3	0	0	0	0	0	0	5	0	5	0	0	0	0	0	2	0	1	0	0	0
89	0	4	0	0	0	0	0	1	0	0	0	1	0	0	0	0	0	0	0	4	0	0	4	3	0	0	0	0	0	0	0	0	0	0	0	0	0	0	0	0	2	0	0	0	4	0	0	0	0
90	0	0	2	0	1.73822	0	0	0	1	0	0	0	2	0	0	0	0	2	4	0	2.15676	0	4	0	3	0	0	0	0	0	0	0	0.573684	0	3	0	0	0	0	0	0	0	2	0	3	0	0	0	0
91	0	2	2	2	0	1	0	0	0	0	5	0	2	2	0	2.04737	1.19372	0	0	0	0	0	1.95789	1.29101	1	3	0	3	0.436842	0.689474	0	0	0	0	2	0	0	2	0	0	2	0	0	0	0	0	0	0	0
92	0	2	3	0	0	0	0	0	0	0	3	2	1	0	0	0	0	0	0	0	0	0	0	3	0	0	0	0.617801	0.436842	0.689474	0.636842	0.510526	0.573684	0.263158	0.475936	0.431579	0.447368	0.273684	0.289474	0	0	2	0	0	0	4	0	0	2
93	0	6	4	4	0	2	0	0	0	0	0	0	0	0	4	4	4	0	4	0	0	4	4	0	2	0	0	0	0	6	0	3	0	0	0	0	0	0	0	0	2	1	0	0	2	0	0	0	0
94	0	6	0	0	0	0	0	0	0	0	2	0	0	0	0	0	0	0	0	0	0	0	2	4	4	2	0	0	0	0	1	0	0	0	0	0	0	0	0	0	2	0	0	0	0	0	0	0	0
95	0	0	0	0	0	1	0	0	0	0	0	0	1	0	0	0	2	0	6	0	2	0	3	2	0	3	0	0	0	0	0	4	0	0	0	0	0	0	0	1	0	1	2	0	0	1	0	0	0
96	3	0	3	0	5	2	1	0	0	0	0	0	2	2	2	3	4	3	1	3	5	0	3	0	0	0	0	0	0	0	0	0	0	0	0	0	0	0	0	5	0	0	0	0	2	0	0	1	0
97	0	2	0	2	0	0	0	0	0	0	0	0	0	0	0	0	0	0	3	0	0	3	4	3	0	0	0	0	0	0	0	0	0	0	0	0	0	0	0	0	0	0	0	0	4	1	0	0	0
98	0	2	0	0	0	0	0	0	0	0	0	0	0	0	0	2	2	0	0	0	0	0	0	2	0	0	0	0	0	0	0	0	0	0	0	0	0	0	0	0	3	0	0	0	0	0	1	0	0
99	0	1	2	0	0	3	0	0	0	0	0	0	0	0	0	1	0	0	0	0.794737	0	0	3	1	0	2	0	0	0	0	0	0	0	0	0	0	0	0	0	0	2	0	0	0	2	1	0	0	0
100	0	4	0	0	0	0	0	0	0	0	0	0	0	0	0	0	0	0	0	0	0	2	1	0	0	0	0	2	0	0	0	5	0	6	0	0	0	0	0	0	2	0	3	0	0	0	0	0	0
101	0	5	0	0	0	0	0	0	0	0	2	0	0	0	0	0	0	0	0	6	0	0	0	4	0	3	0	0	0	0	0	0	0	0.263158	2	0	0	0	0	0	2	0	2	0	0	0	0	0	0
102	0	2	4	0	0	0	0	0	0	0	0	0	0	0	3	0	0	0	0	0	0	0	6	0	3	4	0	0	0	0	0	0	0	0	0	0	0	0	0	0	0	0	0	0	0	3	0	0	0
103	0	2	0	1	0	1	0	1	1	0	0	2	0	0	0	0	4	0	0	0	0	0	3	0	2	0	0	0	0	2	3	4	4	0	0	2	0	0	0	0	0	0	0	0	0	1	1	0	0
104	0	6	0	0	0	0	0	0	0	0	0	0	0	0	0	0	0	0	6	0	5	0	4	0	0	2	0	0	0	0	0	0.510526	2	3	5	0	0	0	0	0	0	2	0	0	2	0	0	0	0
105	0	1	5	3	0	3	5	0	0	0	0	0	0	0	1	0	4	0	4	0	6	0	4	4	0	1	0	0	0	1	2	1	0	0	0	0	0	0	0	0	1	0	1	0	0	1	3	2	0
106	0	5	0	0	0	0	0	0	0	0	0	0	0	0	0	0	0	0	0	0	0	0	0	0	0	0	0	0	0	0	0	0	0	0	0	0	0	0	0	0	1	0	0	0	0	0	0	3	0
107	0	0	2	0	1	0	0	0.528796	0	0	0	0	0	0	1	0	0	2	0	0	0	0	1.95789	0	0	4	0	0	0	4	3	0	0	0	0	5	0	0	0	2	0	4	3	3	0	0	0	2	0
108	0	0	0	0	2	0	0	0	0	0	0	0	2	0	0	0	0	0	0	0	2.15676	0	0	0	0	0	0	0	0	0	0	0	0	0	0	0	0	0	0	0	0	0	0	1	0	0	0	2	0
109	0	0	2	2	3	2	1	0	0	0	3	2	2	3	2	3	0	3	0	4	6	0	0	0	0	0	0	0	0	0	0	0	0	0	0	0	0	0	0	0	0	0	0	1	0	0	0	2	0
110	2	0	3	0	4	0	2	3	0	0	2	4	0	2	3	3	2	4	0	4	0	0	0	2	2	0	2	2	4	4	0	0	2	0	5	6	6	4	6	2	0	0	0	3	0	1	0	0	0
111	0	0	0	1	0	0	0	0	0	0	0	0	0	2	0	0	2	1	0	0	0	0	0	0	0	0	0	0	0	0	0	0	0	2	0	0	0	0	0	0	0	1	0	2	0	0	2	2	0
112	0	0	2	1	0	1	2	0	0	0	2	1	2	0	0	2	0	4	2	0	0	0	2	0	0	4	0	2	0	2	0	0	0	0	0	0	0	0	0	0	0	0	1	2	0	0	0	2	0
113	3	0	2	0	2	0	4	0	0	0	0	0	0	4	3	0	3	4	5	0	6	0	2	0	2	5	2	3	0	0	0	0	0	0	0	0	0	0	0	2	0	0	0	3	0	0	0	0	0
114	1	0	0	0	0	2	0	2	0	0	1	0	0	0	0	2	3	0	4	0	0	0	2	2	0	0	0	0	0	4	4	3	2	2	5	0	0	0	0	0	0	0	0	2	0	0	0	3	2
115	3	0	2	2	2	2	2	3	4	0	4	0	0	4	0	2	0	0	4	0	4	0	0	0	0	0	0	3	0	0	2	2	2	0	0	6	0	4	6	0	0	0	0	2	0	0	0	0	0
116	0	0	3	1	0	0	2	0	2	4	0	2	2	1	0	0	2	0	0	0	0	0	0	0	0	0	0	0	0	2	0	0	0	0	0	0	0	0	0	0	0	0	0	1	0	0	0	0	0
117	0	0	2	2	2	0	3	0	0	2	0	0	2	3	3	1	0	0	0	0	6	0	0	0	0	4	0	0	0	0	0	0	0	0	0	0	0	0	0	0	0	0	2	2	0	0	2	2	0
118	3	0	4	1	4	0	4	0	0	0	0	2	0	0	3	4	2	2	4	0	0	0	2	0	0	4	0	0	0	0	0	0	0	0	0	0	0	0	0	4	0	0	2	3	0	0	0	0	3
119	0	0	0	0	0	3	0	0	0	0	0	0	1	0	0	0	0	0	0	0	6	0	0	0	0	3	1	5	5	0	0	4	2	1	0	0	0	0	0	0	2	0	0	1	0	0	3	0	0
120	0	1	4	4	2	0	1	0	1	0	0	0	3	2	0	3	0	0	4	0	0	0	3	2	0	2	0	3	4	4	4	0	0	0	4	0	0	4	0	2	0	2	3	0	0	0	2	1	0
121	3	1	0	2	2	0	1	2	0	0	0	0	1	2	2	0	3	0	2	0	0	0	2	2	1	3	3	1	2	0	0	0	0	0	0	0	0	0	0	1	0	1	1	2	0	1	1	4	1
122	4	0	3	0	3	2	1	1	0	0	0	0	0	2	0	4	0	0	2	0	4	0	2	3	1	3	0	0	0	0	0	0	0	1	0	0	0	0	0	2	0	0	0	0	1	1	0	0	0
123	3	0	3	0	3	2	2	2	2	3	2	1	2	3	2	2	1	1	0	0	4	0	2	0	2	0	2	3	0	0	0	0	0	0	0	0	0	0	0	1	0	0	0	0	0	0	0	0	0
124	5	0	4	0	4	3	3	0	3	0	0	0	2	3	3	4	2	3	4	0	0	0	3	0	3	0	0	0	0	0	0	0	2	0	0	0	0	0	0	4	0	0	0	2	0	0	0	2	0
125	4	0	4	2	4	3	2	0	4	6	0	0	6	0	2	3	3	0	0	3	3	0	0	0	0	2	0	0	0	0	0	2	0	0	0	0	0	0	0	3	0	1	2	0	0	0	2	0	1
126	2	2	0	3	0	2	0	1	1	1	0	2	0	0	0	3	3	0	0	0	0	3	0	1	0	0	2	2	3	4	2	1	2	1	4	4	0	0	4	1	0	0	0	2	0	0	2	0	0
127	0	0	0	0	0	0	0	1	4	0	0	0	0	0	0	0	0	0	0	0	6	0	0	0	0	0	0	0	0	0	0	0	0	0	0	0	0	0	0	3	0	0	2	2	0	0	0	0	1
128	3	0	4	1	4	3	3	0	5	0	2	0	5	4	2	3	2	2	0	4	0	0	0	0	1	0	0	0	0	0	1	0	0	0	0	0	0	0	0	4	0	0	0	0	0	4	1	2	0
129	0	0	0	2	2	0	0	0	0	0	0	0	2	3	1	3	2	4	2	0	2	0	0	2	0	0	0	5	5	4	2	0	0	0	3	0	5	0	0	3	0	0	0	2	0	0	0	3	3
130	4	0	2	0	4	3	4	0	0	0	0	0	0	5	4	3	2	0	0	5	4	0	0	0	0	3	0	4	0	0	0	0	0	0	0	0	0	0	0	5	0	2	2	0	0	3	3	3	3
131	6	0	6	0	6	5	4	0	5	6	5	0	3	6	6	5	4	6	4	0	6	0	4	4	4	4	0	5	4	0	4	0	0	0	0	6	0	0	0	4	0	0	0	0	0	0	0	2	0
132	2	0	0	0	2	0	0	0	0	2	0	0	0	2	0	0	4	2	0	2	0	0	0	0	0	2	0	0	0	0	0	0	0	0	0	0	0	0	0	2	0	0	4	2	0	0	0	0	0
133	0	3	0	3	0	1	3	0	0	3	0	0	0	0	2	0	0	0	6	0	5	0	0	0	0	0	0	0	0	0	3	0	4	0	0	0	0	0	0	0	2	1	3	0	0	0	4	0	0
134	6	0	2	0	0	0	4	0	3	0	4	0	0	0	2	4	2	0	0	0	6	0	0	0	0	0	0	0	0	0	0	0	0	0	0	0	0	0	0	0	0	1	0	0	0	0	0	0	0
135	6	0	5	0	3	4	1	0	4	0	0	0	3	2	2	4	0	3	0	0	6	0	0	0	0	3	0	0	0	0	0	0	0	0	0	0	0	0	0	5	0	1	0	0	0	0	0	1	0
136	4	0	3	4	0	5	5	0	0	0	0	0	4	2	0	3	4	2	2	0	4	0	2	0	2	4	0	2	2	4	2	0	4	0	4	4	0	0	0	4	0	0	2	2	2	0	0	1	0
137	4	0	4	1	4	4	4	1	4	4	4	2	4	4	4	4	4	2	4	0	5	0	3	2	3	1	1	1	1	2	0	0	0	0	0	0	0	0	0	2	0	0	2	0	0	0	0	0	0
138	2	2	2	0	0	2	0	2	2	2	2	4	0	0	0	0	1	1	0	0	0	4	1	2	0	0	1	2	1	2	2	1	2	2	1	3	4	4	2	0	2	0	3	2	0	0	1	0	0
139	5	0	2	0	0	1	0	4	0	0	4	2	2	5	4	3	3	3	3	0	4	0	0	0	0	0	2	0	0	3	2	1	0	0	2	2	2	0	2	4	0	0	0	1	0	1	0	0	0
140	6	0	4	0	4	4	3	1	0	4	2	2	4	4	2	4	2	3	4	0	5	0	2	3	2	0	5	4	0	0	0	0	0	0	0	0	0	0	0	4	0	0	0	0	0	1	0	1	1
141	3	0	4	0	2	2	1	0	3	4	0	0	0	2	3	3	4	3	0	4	4	0	0	0	3	1	4	3	4	0	3	4	0	0	0	4	0	0	4	4	0	0	0	0	0	0	0	0	0
142	4	0	3	0	2	2	0	5	0	0	0	0	4	4	4	4	3	2	3	0	0	0	2	3	0	0	0	0	0	0	0	0	0	0	0	0	0	0	0	6	0	0	0	0	0	0	3	2	4
143	1	0	0	2	0	0	0	0	3	0	0	0	0	0	3	2	2	0	1	0	4	0	2	0	0	0	0	0	0	0	0	0	0	0	0	0	0	0	0	1	0	0	0	2	0	0	0	0	0
144	5	0	4	0	2	3	4	0	0	0	3	2	0	0	0	1	2	3	4	0	0	0	2	0	4	0	2	0	2	0	2	0	0	0	0	0	0	0	0	4	0	1	1	2	0	0	0	2	0
145	6	0	4	0	5	4	4	0	0	0	2	0	4	4	2	4	2	2	0	0	0	0	0	1	4	2	0	0	0	0	1	0	0	0	0	0	0	0	0	6	0	0	0	0	0	1	0	3	1
146	2	0	0	1	0	1	1	0	2	0	0	0	1	1	3	0	0	2	3	0	3	0	0	0	1	0	0	0	0	0	0	0	0	0	0	0	0	0	0	4	0	0	2	0	0	0	0	2	0
147	3	0	4	0	0	3	1	0	0	3	0	0	5	3	0	3	2	3	4	0	0	0	0	0	3	2	0	2	0	0	0	0	0	0	0	0	0	0	0	3	0	0	0	0	0	1	0	0	1
148	5	0	4	0	6	4	3	0	0	0	0	0	3	4	3	4	2	4	3	0	5	0	3	0	4	0	6	3	0	0	0	0	2	0	0	2	0	0	0	4	0	1	0	3	0	1	0	3	3
149	0	0	2	0	0	5	0	5	0	0	0	0	2	0	0	2	3	2	0	0	0	0	0	2	3	3	0	0	0	2	0	0	0	0	0	0	0	0	0	2	0	0	0	0	0	0	0	2	0
150	3	0	0	1	0	1	1	3	2	4	2	2	3	2	0	3	0	0	2	4	0	0	2	2	3	0	0	0	0	3	1	0	0	0	0	1	3	2	1	1	0	0	0	1	0	0	0	0	0
151	4	0	4	0	4	2	3	0	4	0	0	0	4	2	1	4	0	2	3	0	4	0	0	0	2	2	2	0	0	3	0	0	0	0	0	0	0	0	0	4	0	0	0	3	0	1	0	3	3
152	4	0	2	3	3	2	4	0	0	4	4	0	1	4	1	1	0	3	0	0	6	0	3	0	2	0	0	0	0	0	0	0	0	0	0	0	0	0	0	4	0	0	0	0	0	1	0	0	2
153	2	0	3	0	0	2	1	3	1	0	0	0	3	2	4	4	3	0	2	0	4	0	0	2	0	3	0	0	0	0	2	0	0	0	0	0	0	0	0	3	0	0	0	0	0	0	0	0	0
154	0	0	2	1	3	3	0	0	3	0	2	0	2	1	2	4	3	0	0	0	0	0	1	0	1	4	0	0	0	0	0	0	1	0	0	0	0	0	0	0	0	0	0	3	0	0	3	3	3
155	0	0	0	2	4	0	1	0	0	2	0	0	0	1	4	0	0	0	4	0	0	0	0	2	0	0	0	0	2	0	6	5	4	0	0	0	0	0	0	4	0	0	0	3	0	2	0	0	0
156	0	0	0	1	1	1	0	0	0	0	0	0	0	2	0	0	0	0	0	0	4	0	2	0	0	0	0	0	0	0	0	0	0	0	0	0	0	0	0	0	0	0	0	1	0	0	0	2	0
157	2	0	1	0	1	2	1	0	0	0	0	0	3	4	0	2	0	2	0	0	3	0	1	0	0	0	0	0	0	0	0	0	0	0	0	0	0	0	0	2	0	0	0	0	0	0	0	1	0
158	0	0	3	0	0	0	0	0	0	0	0	0	0	0	4	2	0	0	5	0	0	0	2	0	0	4	0	0	0	0	0	0	0	0	0	0	0	0	0	4	0	2	2	0	3	0	0	0	0
159	4	0	4	0	4	4	2	0	0	0	3	0	2	3	3	4	3	4	0	4	0	0	2	2	2	0	3	0	0	0	0	0	0	0	0	0	0	0	0	1	0	0	0	0	0	0	0	0	0
160	4	0	5	2	0	3	1	4	2	0	5	0	0	0	0	4	2	0	5	0	6	0	4	4	4	2	0	0	0	0	0	0	1	0	2	0	0	0	0	1	0	0	0	0	2	0	0	0	0
161	0	2	0	0	0	1	0	0	0	2	0	0	0	0	0	0	0	0	0	0	0	4	0	1	0	0	0	0	0	0	0	3	0	2	0	0	0	0	0	0	3	2	1	1	0	0	0	0	1
162	3	0	3	0	3	4	4	0	2	2	2	0	0	3	0	2	0	2	0	3	4	0	2	0	0	0	1	0	0	3	0	0	0	0	0	0	0	0	0	4	0	0	0	0	0	0	0	0	0
163	0	4	0	0	0	0	0	0	0	0	0	0	0	0	0	0	0	0	0	0	0	2	1	0	0	0	0	2	0	0	0	5	0	6	0	0	0	0	0	0	2	0	3	0	0	0	0	0	0
164	5	0	4	3	5	4	1	0	0	3	2	0	2	2	0	2	2	0	0	2	3	0	1	0	2	2	0	2	0	0	0	0	0	0	0	0	0	0	0	4	0	1	0	0	0	0	0	0	1
165	1	2	2	0	0	1	1	0	0	0	0	0	1	0	2	4	1	0	2	0	3	1	2	0	3	2	0	0	0	0	0	0	0	0	0	0	0	0	0	0	1	0	1	1	0	0	0	0	0
166	4	0	4	5	4	1	4	0	0	0	2	0	0	2	4	4	0	3	4	0	6	0	4	3	2	2	2	0	0	3	0	0	0	0	0	0	0	0	0	4	0	2	0	0	2	0	0	0	0
167	5	0	5	0	3	4	4	0	0	4	2	2	0	0	0	3	0	0	0	0	3	0	3	0	4	2	0	0	2	0	2	0	0	0	0	0	6	0	0	2	0	1	2	3	0	0	0	0	0
168	0	0	2	0	0	0	0	0	0	0	0	0	2	0	0	2	0	0	3	0	0	0	3	0	0	0	0	0	0	0	0	0	0	0	0	0	0	0	0	0	1	0	0	0	2	0	0	0	0
169	3	0	0	0	3	2	1	0	0	0	0	0	0	3	1	4	0	0	0	4	3	0	1	0	0	0	0	0	0	0	0	0	0	0	0	0	0	0	0	4	0	0	0	1	0	1	0	0	0
170	1	0	0	2	2	0	0	0	0	0	0	0	1	2	0	4	0	0	4	0	0	0	4	0	3	0	0	0	0	0	0	0	0	0	0	0	0	0	0	0	0	0	0	0	1	0	0	0	0
171	5	0	2	0	3	5	3	0	0	0	2	0	5	4	0	4	2	0	6	0	6	0	2	2	2	0	0	3	2	2	2	0	3	0	2	0	0	0	0	4	0	0	0	0	3	0	0	0	4
172	6	0	2	0	5	0	4	0	0	0	0	0	0	5	2	0	4	5	1	0	6	0	3	5	0	3	0	0	0	0	0	0	0	0	0	0	0	0	0	5	0	0	0	2	4	1	0	2	0
173	3	0	4	0	0	5	2	2	0	0	0	0	0	0	0	4	0	4	4	0	0	0	3	0	0	0	0	0	0	0	4	0	0	0	0	0	0	0	0	3	0	1	0	2	0	0	0	0	4
174	0	0	0	0	3	2	0	0	0	0	0	0	0	3	0	3	2	0	2	0	4	0	0	0	0	0	0	0	0	0	0	0	0	0	0	0	0	0	0	0	0	0	0	3	2	0	0	0	0
175	4	0	3	0	4	4	3	0	3	0	2	2	2	3	2	5	0	5	5	0	6	0	3	2	1	0	0	1	0	0	0	0	0	0	0	0	0	0	0	4	0	0	0	0	0	0	0	0	0
176	1	0	3	0	1	0	0	2	0	0	0	0	2	1	3	2	0	1	2	0	4	0	3	2	3	0	0	0	0	2	0	0	0	0	0	0	0	0	0	0	0	0	0	2	3	0	0	0	2
177	5	0	3	0	2	3	2	1	5	0	3	2	0	0	2	4	2	4	6	0	4	0	3	5	4	0	0	0	0	0	0	0	0	0	0	0	0	0	0	4	0	1	0	0	1	0	0	1	0
178	2	0	2	0	3	4	1	0	0	4	0	0	0	1	0	2	0	2	2	0	2	0	2	3	3	2	0	2	2	0	0	0	0	0	0	0	0	0	0	0	0	0	0	0	0	1	0	0	1
179	0	1	0	0	0	0	0	0	0	0	0	0	0	0	0	0	0	0	0	0	0	0	0	0	0	0	0	0	0	0	0	0	0	0	0	0	0	0	0	4	0	0	0	4	0	0	0	0	0
180	4	0	2	0	3	4	0	0	0	0	0	0	2	0	0	4	1	0	0	0	0	0	2	0	0	3	0	0	0	0	0	0	0	0	0	0	0	0	0	1	0	0	0	2	3	0	0	2	3
181	4	0	4	0	3	3	1	0	0	0	0	0	0	0	0	2	0	0	0	2	0	0	0	0	2	0	0	0	0	0	3	0	0	0	0	1	0	0	0	4	0	0	0	2	0	0	0	2	0
182	0	2	3	0	0	0	0	0	0	2	0	0	0	0	2	2	0	0	0	2	2	0	0	1	3	0	0	0	0	0	0	4	4	0	0	0	0	0	0	0	3	0	3	0	0	0	0	0	0
183	2	0	0	0	2	0	0	0	0	0	0	0	0	0	0	3	0	0	0	0	6	0	0	0	0	0	0	0	0	3	0	2	0	2	3	5	0	0	0	0	0	0	0	3	0	0	0	0	0
184	5	0	3	0	4	4	1	0	2	0	1	0	3	2	3	4	2	4	6	0	0	0	3	2	0	2	1	0	0	0	0	0	0	0	0	0	0	0	0	1	0	0	0	0	2	0	0	0	0
185	3	0	3	4	2	2	2	0	0	0	0	0	0	0	0	0	2	0	0	0	6	0	0	0	2	0	0	2	0	0	1	1	0	0	0	0	0	0	0	2	0	2	0	2	0	1	0	2	0
186	3	0	3	0	2	3	2	2	0	0	2	0	0	0	0	2	0	0	0	4	0	0	2	2	2	0	3	0	0	0	2	0	0	0	0	4	3	0	0	3	0	0	0	3	2	2	0	2	0
187	4	0	3	2	4	3	2	5	3	3	2	1	3	4	2	3	2	4	4	0	4	0	3	2	0	3	1	1	0	0	2	0	0	0	0	0	0	0	0	4	0	1	0	0	0	0	0	1	0
188	0	0	3	0	3	3	3	0	2	0	2	1	2	4	2	4	3	0	3	0	5	0	0	0	0	0	0	0	0	0	0	0	0	0	0	0	0	0	0	2	0	0	0	0	2	0	0	0	0
189	4	0	2	0	0	0	0	0	0	0	2	0	2	1	0	4	0	2	0	0	0	0	0	0	0	0	0	0	0	0	0	0	0	0	0	0	0	0	0	0	0	0	0	3	2	0	0	0	1
190	6	0	4	1	4	2	3	0	0	0	2	0	3	4	2	4	0	4	4	0	3	0	2	4	2	0	4	3	0	0	0	0	0	0	0	0	0	0	0	4	0	0	0	0	0	0	0	2	0
191	0	0	0	0	0	1	0	0	0	0	0	0	2	0	2	3	3	2	0	1	3	0	4	0	0	0	0	0	0	0	0	0	0	0	0	0	0	0	0	0	0	0	0	3	0	0	0	0	0
192	0	0	2	0	0	0	0	0	0	3	4	0	0	0	0	0	0	0	0	0	4	0	0	0	0	0	0	0	0	0	0	0	0	0	0	0	0	0	0	0	0	0	0	0	0	0	0	0	2
[truncated: 14 more columns]
